# Supplementary material for: Fecal Microbiota Transplantation Controls Murine Chronic Intestinal Inflammation by Modulating Immune Cell Functions and Gut Microbiota Composition
Source: PubMed Central journal article supplement (PMC6628315; doi:10.3390/cells8060517), 2019-05-28
Supplement: cells-08-00517-s001.pdf [file cells-08-00517-s001.pdf]

1 **Supplementary Material**

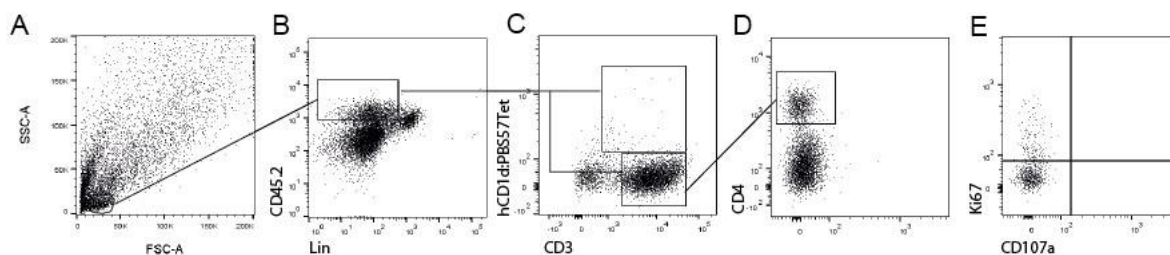

2

3 **Figure S1.** Gating strategy. (A) Forward and side scatter of colonic LPMC gate indicates living  
 4 lymphocytes. (B) Epithelial cell-excluding gate based on CD45.2 expression and Lineage (CD19,  
 5 CD11c, CD11b)-excluding gate. (C) The mCD1d:PBS57 Tet and CD3 staining to identify iNKT cells.  
 6 (D) On CD3+ cells, CD4 (or CD8) staining cells to identify ConvT cells. (E) Ki67 and CD107a on iNKT,  
 7 CD4+, or CD8+ cells.

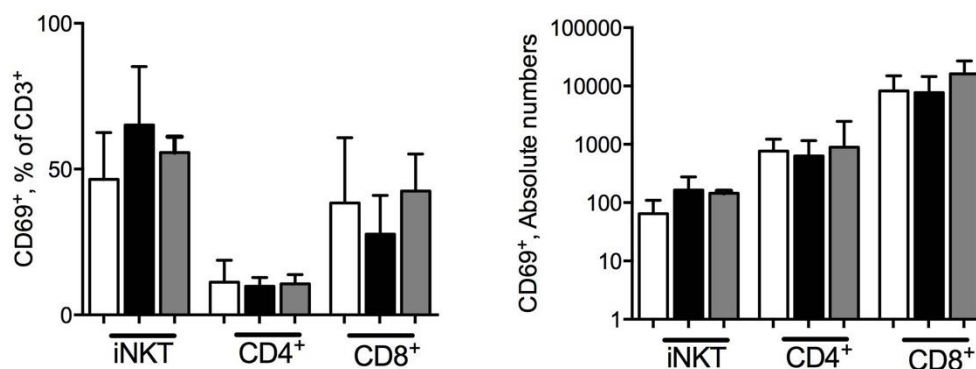

8

9 **Figure S2.** CD69 expression Frequencies and absolute numbers of CD69 positive colonic CD4+ T, CD8+  
 10 T cells, and iNKT cells in untreated (white bars), chronic- DSS-treated (black bars) and FMT-treated  
 11 (grey bars) mice 63 days after starting DSS administration.

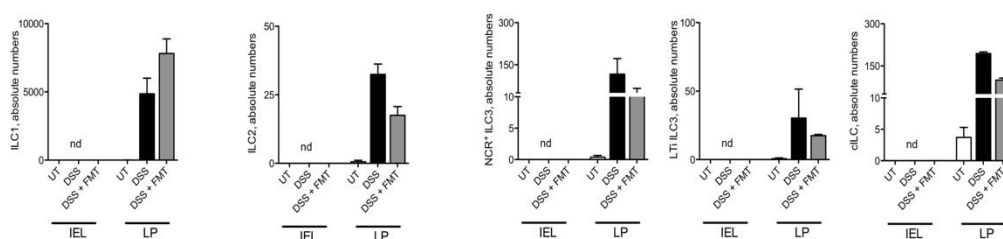

12

13 **Figure S3.** Analysis of innate lymphoid cells (ILC). (A) Lamina propria (LP) and intra-epithelial (IEL)  
 14 ILC1, ILC2, ILC3 (NCR, LTI, cILC) absolute numbers from chronic DSS-treated mice (untreated, white

15 bars; DSS/TNBS/Chronic DSS, black bars; FMT, grey bars). Significance was determined using  
 16 unpaired two-tailed Mann-Whitney test and expressed as mean±SEM. Outliers were detected with  
 17 Grubb's test.  $P < 0.05$  (\*) was regarded as statistically significant.

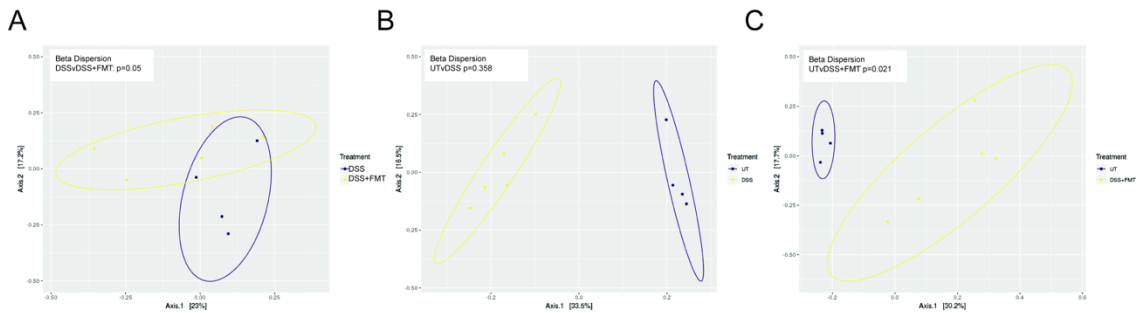

18

19 **Figure S4.** Microbiome clustering based on Principal Coordinate Analysis (PCoA) of unweighted  
 20 UniFrac distances of faecal gut microbiota derived from (A) cDSS- and cDSS + FMT-, (B) UT and cDSS-  
 21 (blue dots), and (C) UT and cDSS+ FMT-treated mice. Significant differences in beta-diversity between  
 22 groups were determined by beta-dispersion and PERMANOVA with p-value correction by  
 23 Bonferonni (padj), with  $P < 0.05$  as cut-off for significance.

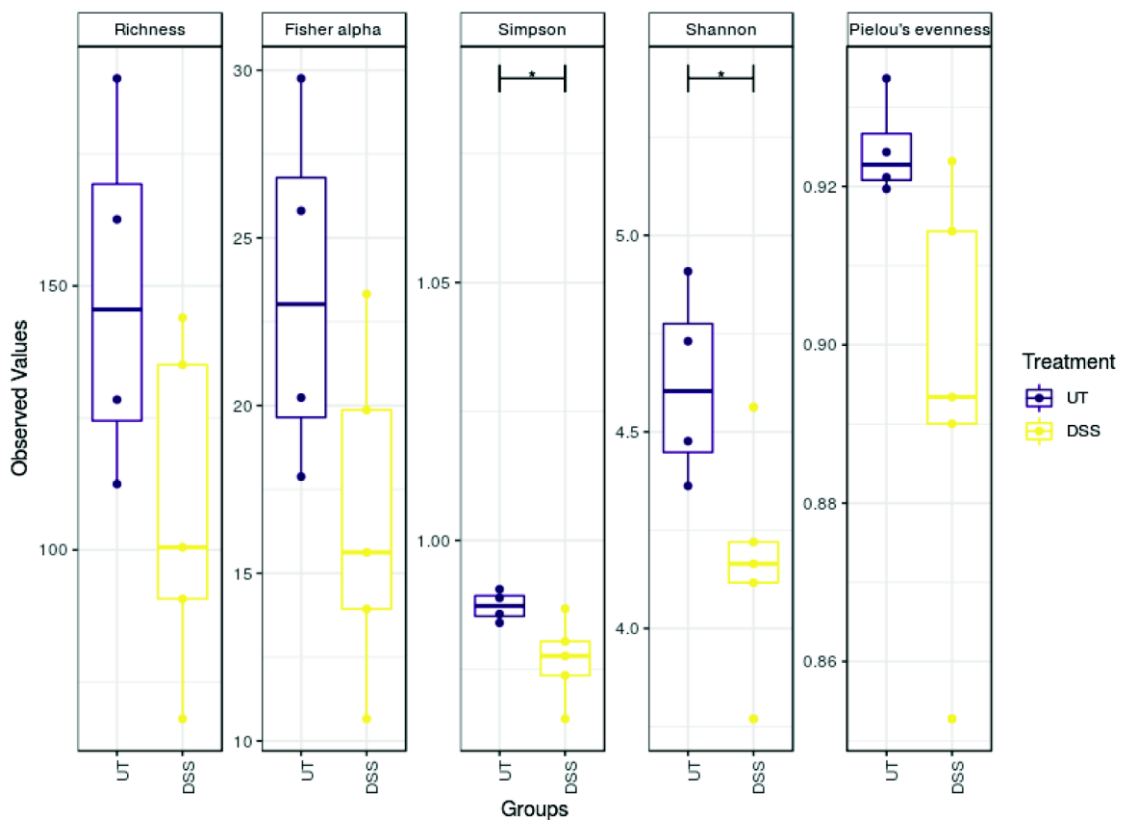

24

25 **Figure S5.** Comparison of alpha-diversity metrics between untreated (violet boxes) and cDSS (yellow  
 26 boxes)-treated mice. Significant differences in alpha-diversity between groups were determined by  
 27 ANOVA, with  $P < 0.05$  as cut-off for significance.

28

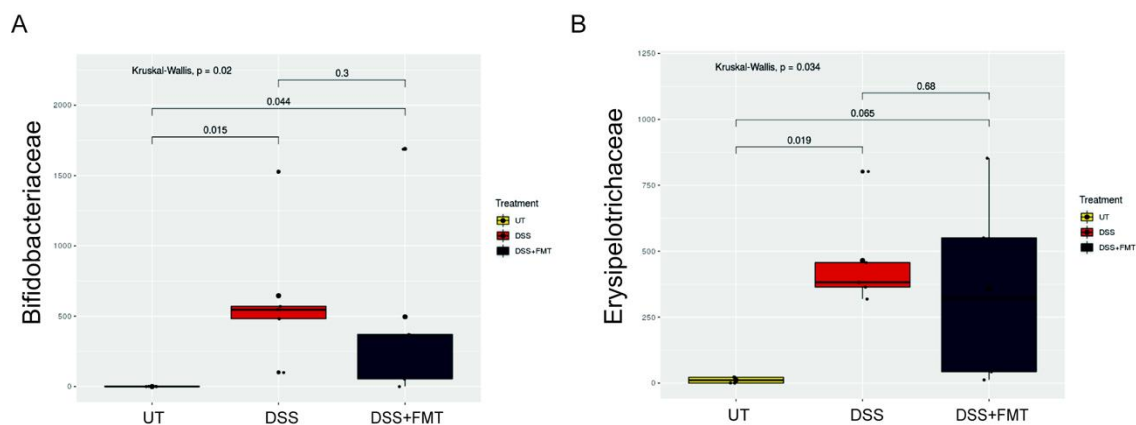

29

30 **Figure S6.** Abundance comparison of (A) *Bifidobacteriaceae* and (B) *Erysipelotrichaceae* families and in  
 31 untreated (yellow box), cDSS- (red box), and cDSS + FMT (violet box)-treated mice. Significant  
 32 differences in taxon abundance between groups were determined by Kruskal-Wallis, with  $P < 0.05$  as  
 33 cut-off for significance.

34

**Table S1.** Scoring scheme for evaluation of intestinal inflammation.

|                                     | Criterion                                                                                                                 | Definition                                                            | Score Value |
|-------------------------------------|---------------------------------------------------------------------------------------------------------------------------|-----------------------------------------------------------------------|-------------|
| <b>Inflammatory Cell Infiltrate</b> | Severity (leukocyte density of lamina propria area infiltrated in evaluated hpf)                                          | No infiltrate                                                         | 0           |
|                                     |                                                                                                                           | Minimal acute (<10%)                                                  | 0.25        |
|                                     |                                                                                                                           | Mild chronic (10–25%, scattered neutrophils)                          | 0.5         |
|                                     |                                                                                                                           | Moderate chronic (26–50%)                                             | 0.75        |
|                                     |                                                                                                                           | Marked (>51%, dense infiltrate)                                       | 1           |
|                                     |                                                                                                                           | Extent (expansion of leukocyte infiltration)                          | Mucosal     |
|                                     |                                                                                                                           | Mucosal and submucosal                                                | 0.75        |
| <b>Epithelial Changes</b>           | Hyperplasia (increase in epithelial cell numbers in longitudinal crypts, visible as crypt elongation)                     | No hyperplasia                                                        | 0           |
|                                     |                                                                                                                           | Minimal (<25%)                                                        | 0.25        |
|                                     |                                                                                                                           | Mild (26–35%)                                                         | 0.5         |
|                                     |                                                                                                                           | Moderate (36–50%, mitoses in the upper third of the crypt epithelium) | 0.75        |
|                                     |                                                                                                                           | Marked (>51%, mitoses in crypt epithelium distant from crypt base)    | 1           |
| <b>Mucosal architecture</b>         | Goblet cell loss (reduction of goblet cell numbers relative to baseline goblet cell numbers per crypt)                    | No loss                                                               | 0           |
|                                     |                                                                                                                           | Minimal (<25%)                                                        | 0.25        |
|                                     |                                                                                                                           | Mild (26–35%)                                                         | 0.5         |
|                                     |                                                                                                                           | Moderate (36–50%)                                                     | 0.75        |
|                                     |                                                                                                                           | Marked (>51%)                                                         | 1           |
| <b>Mucosal architecture</b>         | Ulceration (epithelial defect reaching beyond muscularis mucosae)                                                         | No ulcers                                                             | 0           |
|                                     |                                                                                                                           | Ulcers                                                                | 0.25        |
|                                     | Granulation tissue (connective tissue repair with new capillaries, surrounded by infiltrating cells, hypertrophied areas) | No granulation tissue                                                 | 0           |
|                                     |                                                                                                                           | Granulation tissue                                                    | 0.25        |
|                                     | Mucosal thickness and crypt depth                                                                                         | No thickening                                                         | 0           |

|                       |                |     |
|-----------------------|----------------|-----|
|                       | Thickening     | 0.5 |
| Glandular rarefaction | No rarefaction | 0   |
|                       | Rarefaction    | 0.5 |
| Dysplasia             | No dysplasia   | 0   |
|                       | Dysplasia      | 0.5 |
|                       | MAX SCORE      | 6   |

35

Table S2. Primer sequences.

| Primer | Product             | Vendor      |
|--------|---------------------|-------------|
| IL17a  | Qiagen (QuantiTect) | QT00103278  |
| IFNg   | Qiagen (QuantiTect) | QT01038821  |
| Rpl32  | Qiagen (QuantiTect) | QT00131992  |
| Camp1  | Qiagen (QuantiTect) | QT00241003  |
| S100A8 | Qiagen (QuantiTect) | QT00250264  |
| IL1b   | Qiagen (QuantiTect) | QT010483555 |

36

Table S2. Cont.

| Primer | Forward                | Reverse              | bp  | Vendor |
|--------|------------------------|----------------------|-----|--------|
| TNF    | TCTTCTCATTCCTGCTTG     | CACTTGGTGGTTTGCT     | 200 | SIGMA  |
| IL6    | CTCTGGGAAATCGTGGA      | GCAAGTGCATCATCG      | 77  | SIGMA  |
| Muc1   | TACCCTACCTACCACACTCACG | CTGCTACTGCCATTACCTGC | 95  | SIGMA  |
| Muc3   | CTTCCAGCCTTCCCTAAACC   | TCCACAGATCCATGCAAAC  | 119 | SIGMA  |
| Muc4   | GAGAGTTCCTGGCTGTGTC    | GGACATGGGTGTCTGTGTTG | 101 | SIGMA  |

37

38

Table S3. FACS antibodies and dyes.

| Mouse               | clone        | Vendor                  |
|---------------------|--------------|-------------------------|
| CD45.2              | 104          | Biologend               |
| CD3                 | 17A2         | BD                      |
| CD4                 | GK1.5        | BD                      |
| CD11c               | HL3          | BD                      |
| CD19                | 1D3          | BD                      |
| CD11b               | M1/70        | BD                      |
| F4/80               | BM8          | Biologend               |
| Ly6g                | 1A8          | Biologend               |
| Ly6c                | AL-21        | eBioscience             |
| MHC-II              | M5/114.15.2  | eBioscience             |
| Ki67                | 16A8         | Biologend               |
| CD107a              | 1D4B         | BD                      |
| Ter119              | TER-119      | BD                      |
| TCR $\alpha/\beta$  | H57.597      | BD                      |
| TCR $\gamma/\delta$ | UC713B5      | Biologend               |
| CD90                | 53-2.1       | BD                      |
| CD117               | 2B8          | BD                      |
| CD127               | A7R34        | Biologend               |
| Nkp46               | 29A1.4       | BD                      |
| RoryT               | AFKJS9       | eBioscience             |
| ST-2                | DIH9         | Biologend               |
| CD25                | PC61         | BD                      |
| IFNg                | XMG1.2       | BD                      |
| IL17A               | TC11-18H10.1 | Biologend               |
| IL13                | eBio13A      | eBioscience             |
| Zombie Dye          |              | Biologend (Cat #423104) |

---

|      |          |            |
|------|----------|------------|
| Zo-1 | ZO1-1A12 | Invitrogen |
|------|----------|------------|

---
